# Supplementary material for: Mechanistic insights into the electrochemical reduction of CO2 to CO on Ni(salphen) complexes
Source: Royal Society of Chemistry journal article supplement (doi:10.1039/d3qi00424d), 2023-01-01
Supplement: d3qi00424d1.pdf [file d3qi00424d1.pdf]

**Supporting Information**  
**for**

**Mechanistic Insights into the electrochemical reduction of CO<sub>2</sub> to CO  
on Ni(salphen) complexes**

Sara Realista,<sup>1</sup> Paulo J. Costa,<sup>2</sup> Luisa B. Maia,<sup>3</sup> Maria José Calhorda,<sup>2\*</sup> and Paulo N. Martinho<sup>1\*</sup>

<sup>1</sup> Centro de Química Estrutural, Institute of Molecular Sciences, Departamento de Química e Bioquímica, Faculdade de Ciências, Universidade de Lisboa, Campo Grande, 1749-016 Lisboa, Portugal

<sup>2</sup> BiolSI - Biosystems & Integrative Sciences Institute, Faculdade de Ciências, Universidade de Lisboa, Campo Grande, C8 bdg, 1749-016 Lisboa, Portugal

<sup>3</sup> LAQV, REQUIMTE, Department of Chemistry, NOVA School of Science and Technology | FCT NOVA, Campus de Caparica, 2829-516 Caparica, Portugal

| Contents                                                                                                                                                                                                                                                                                                                                                                                 | Page |
|------------------------------------------------------------------------------------------------------------------------------------------------------------------------------------------------------------------------------------------------------------------------------------------------------------------------------------------------------------------------------------------|------|
| <b>Figure S1.</b> Cyclic voltammograms of complex <b>1</b> (1 mM) in DMF, argon saturated solution using TBAPF <sub>6</sub> as supporting electrolyte (0.1 M) at different scan rates. Glassy carbon was used as working, platinum wire as counter and SCE as reference electrodes.                                                                                                      | 3    |
| <b>Figure S2.</b> Frontier orbitals of [Ni(salphen)], [ <b>1</b> ].                                                                                                                                                                                                                                                                                                                      | 3    |
| <b>Figure S3.</b> Frontier orbitals of [ <b>2</b> ].                                                                                                                                                                                                                                                                                                                                     | 4    |
| <b>Figure S4.</b> Frontier orbitals of [ <b>3</b> ].                                                                                                                                                                                                                                                                                                                                     | 5    |
| <b>Figure S5.</b> Structure of [Ni <sub>2</sub> (salphen) <sub>2</sub> ] <sup>2-</sup> .                                                                                                                                                                                                                                                                                                 | 5    |
| <b>Figure S6.</b> Cyclic voltammograms of complexes <b>1</b> and <b>2</b> (1 mM) in DMF, carbon dioxide saturated solutions using TBAPF <sub>6</sub> as supporting electrolyte (0.1 M) at 100 mV s <sup>-1</sup> . Different concentrations of Brønsted acid (water) added. Glassy carbon was used as working, platinum wire as counter and SCE as reference electrodes.                 | 6    |
| <b>Figure S7.</b> CPE results. Behaviour of current during electrolysis of <b>1</b> (left) and <b>3</b> (right). Inset: Charge passed during electrolysis. Glassy carbon was used as working electrode, platinum wire as counter and SCE as reference electrode.                                                                                                                         | 6    |
| <b>Figure S8.</b> CPE results. Behaviour of current during electrolysis of <b>2</b> at -1.9 (left) and 2.1 V (right). Inset: Charge passed during electrolysis. Glassy carbon was used as working electrode, platinum wire as counter and SCE as reference electrode.                                                                                                                    | 6    |
| <b>Figure S9.</b> Colour change observation from orange (a) (before electrolysis) to brown (b) (after electrolysis). After air injection into the solution colour reverts back to orange (c).                                                                                                                                                                                            | 7    |
| <b>Figure S10.</b> UV-vis spectra in H <sub>2</sub> O of: solution of <b>2</b> after CPE and injection of O <sub>2</sub> (blue line); same solution after addition of Fe(II) solution (red line); Fe(II) solution.                                                                                                                                                                       | 7    |
| <b>Figure S11.</b> Cyclic voltammograms of complex <b>3</b> (1 mM) in DMF, argon and carbon monoxide saturated solutions using TBAPF <sub>6</sub> as supporting electrolyte (0.1 M) at 100 mV s <sup>-1</sup> . Glassy carbon was used as working, platinum wire as counter and SCE as reference electrodes. Effect of different concentrations of added water.                          | 8    |
| <b>Figure S12.</b> Frontier orbitals of <sup>2</sup> [ <b>1</b> ].                                                                                                                                                                                                                                                                                                                       | 8    |
| <b>Figure S13.</b> Frontier orbitals of <sup>1</sup> [ <b>1</b> ] <sup>2-</sup> .                                                                                                                                                                                                                                                                                                        | 9    |
| <b>Figure S14.</b> Frontier orbitals of <sup>3</sup> [ <b>1</b> ] <sup>2-</sup> .                                                                                                                                                                                                                                                                                                        | 10   |
| <b>Figure S15.</b> a) Current and charge (inset) behavior during CPE of complex <b>1</b> under CO at -1.6 V vs SCE. b) Linear voltammograms before and after electrolysis of <b>1</b> in DMF using TBAPF <sub>6</sub> as supporting electrolyte (0.1 M) at 10 mV s <sup>-1</sup> . Glassy carbon was used as working electrode, platinum wire as counter and SCE as reference electrode  | 10   |
| <b>Figure S16.</b> UV-vis spectra obtained for <b>1</b> after CPE under CO before and during exposure of the solution to atmospheric O <sub>2</sub> .                                                                                                                                                                                                                                    | 11   |
| <b>Figure S17.</b> Walsh diagram for the conversion of linear into angular CO <sub>2</sub> : the π orbitals (left) and H <sub>β</sub> -1 Ni-C σ bonding orbital depicting the back donation from the metal to the LUMO of CO <sub>2</sub> (right) in <sup>3</sup> [ <b>1</b> (CO <sub>2</sub> )] <sup>2-</sup> .                                                                         | 11   |
| <b>Figure S18.</b> Frontier orbitals of <sup>3</sup> [ <b>1</b> (CO <sub>2</sub> )] <sup>2-</sup> .                                                                                                                                                                                                                                                                                      | 12   |
| <b>Figure S19.</b> Energy profile for the reactions of the reduced complexes <sup>2</sup> [ <b>1</b> ] and <sup>3</sup> [ <b>1</b> ] <sup>2-</sup> with CO <sub>2</sub> in DMF (relative energies, ΔG, in kcal mol <sup>-1</sup> ).                                                                                                                                                      | 12   |
| <b>Figure S20.</b> Experimental and calculated (TDDFT, black line) spectra of [Ni(salphen)] ( <b>1</b> ). The sticks correspond to the calculated wavelengths.                                                                                                                                                                                                                           | 12   |
| <b>Table S1.</b> Relevant TD-DFT excitation energies (λ), oscillator strengths (f) and compositions, for complexes [Ni(salphen)], [ <b>1</b> ].                                                                                                                                                                                                                                          | 13   |
| <b>Figure S21.</b> Absorption spectrum of the CO container species <sup>2</sup> [ <b>1</b> (CO)]: experimental (red line) and calculated (TDDFT, black line) spectra. The sticks correspond to the calculated wavelengths.                                                                                                                                                               | 14   |
| <b>Figure S22.</b> Absorption spectrum of the CO container species <sup>3</sup> [ <b>1</b> (CO)] + H <sub>2</sub> O: experimental (red line) and calculated (TDDFT, black line) spectra. The sticks correspond to the calculated wavelengths.                                                                                                                                            | 14   |
| <b>Figure S23.</b> Energy profile for the reactions of the reduced complexes <sup>2</sup> [ <b>1</b> ] with CO <sub>2</sub> (right side, blue) and CO (left side, turquoise). The free energies, ΔG, are given in kcal mol <sup>-1</sup> and the reference 0 is the energy of <sup>2</sup> [ <b>1</b> ]. The two reduction and the spin transition steps are highlighted in both cycles. | 15   |

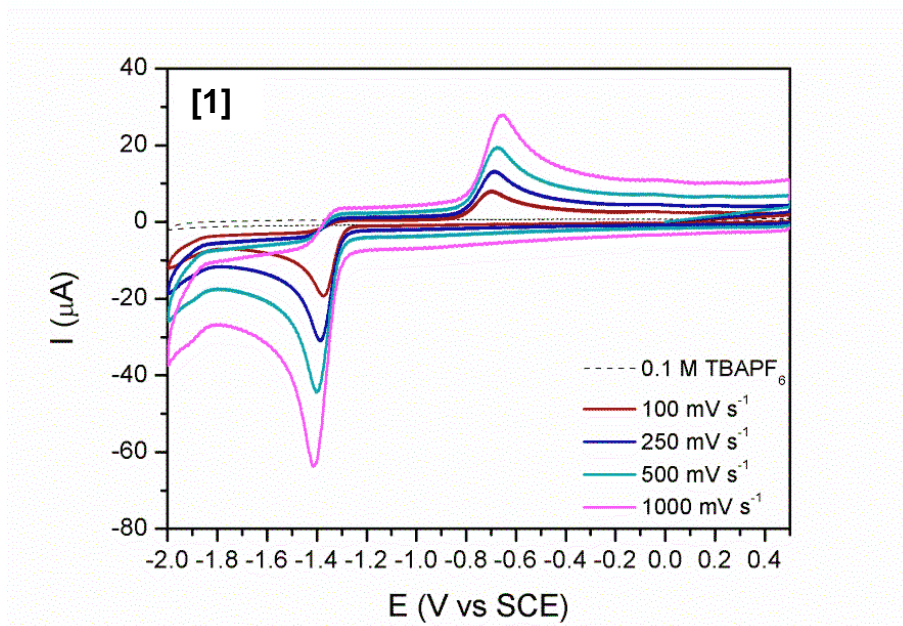

**Figure S1.** Cyclic voltammograms of complex **1** (1 mM) in DMF, argon saturated solution using TBAPF<sub>6</sub> as supporting electrolyte (0.1 M) at different scan rates. Glassy carbon was used as working, platinum wire as counter and SCE as reference electrodes.

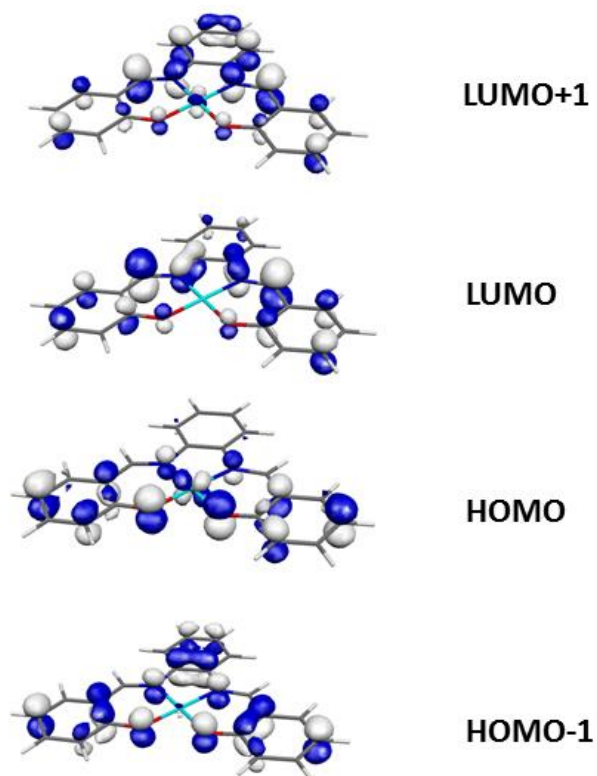

**Figure S2.** Frontier orbitals of [Ni(salphen)], **[1]**.

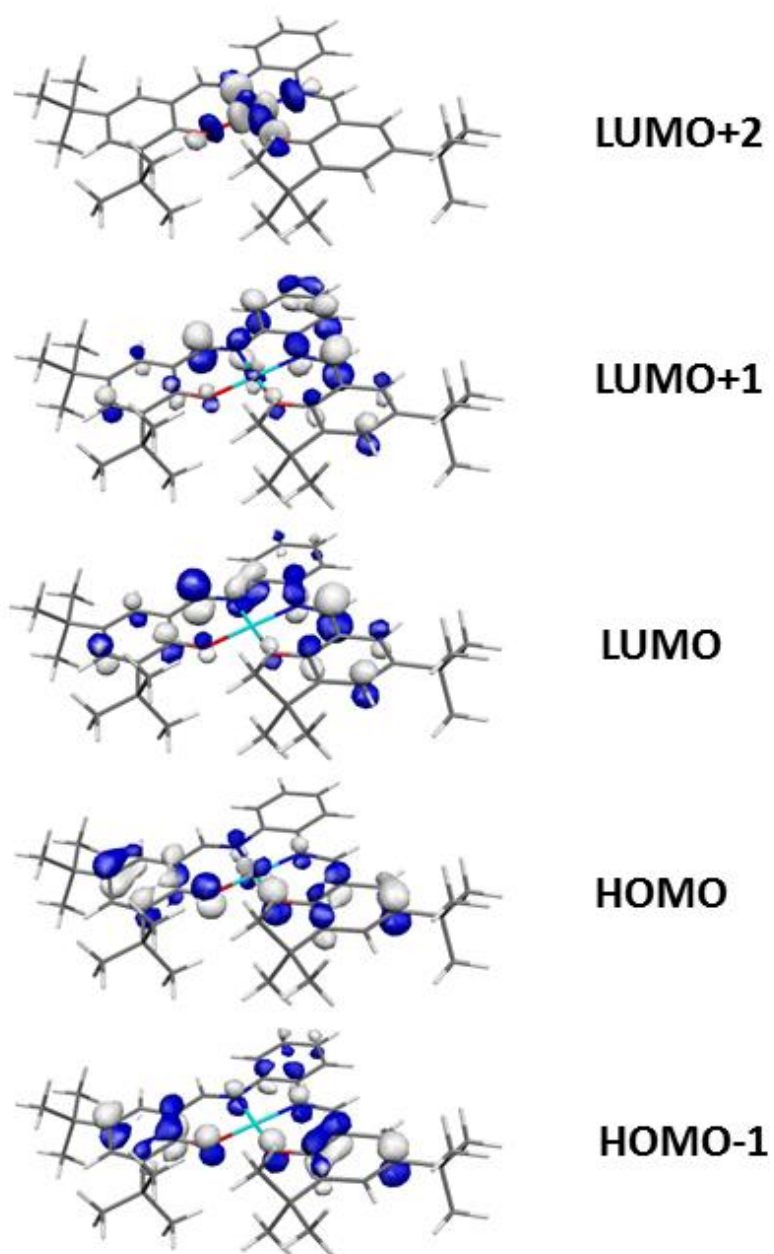

**Figure S3.** Frontier orbitals of [2].

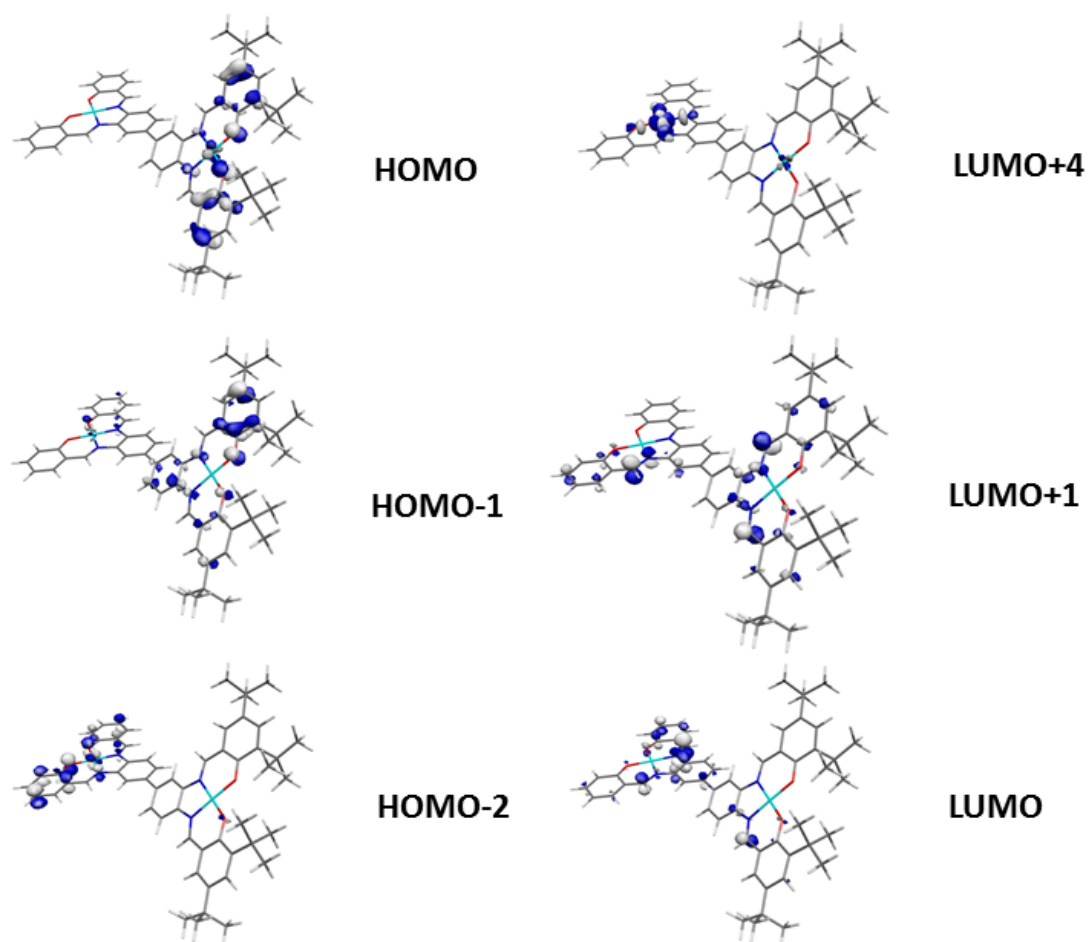

**Figure S4.** Frontier orbitals of [3].

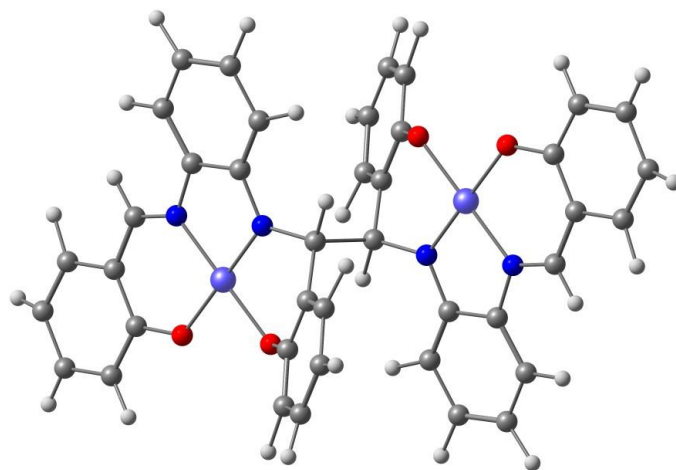

**Figure S5.** Structure of  $[\text{Ni}_2(\text{salphen})_2]^{2-}$ .<sup>1</sup>

<sup>1</sup> S. Gambarotta, F. Urso, C. Floriani, A. Chiesi-Villa, C. Guastini, *Inorg. Chem.* 1983, 22, 3966-3972

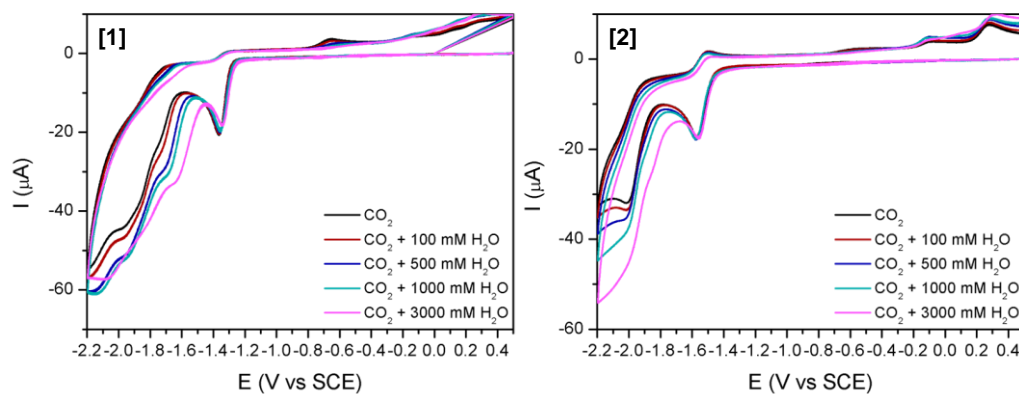

**Figure S6.** Cyclic voltammograms of complexes **1** and **2** (1 mM) in DMF, carbon dioxide saturated solutions using TBAPF<sub>6</sub> as supporting electrolyte (0.1 M) at 100 mV s<sup>-1</sup>. Different concentrations of Brønsted acid (water) added. Glassy carbon was used as working, platinum wire as counter and SCE as reference electrodes.

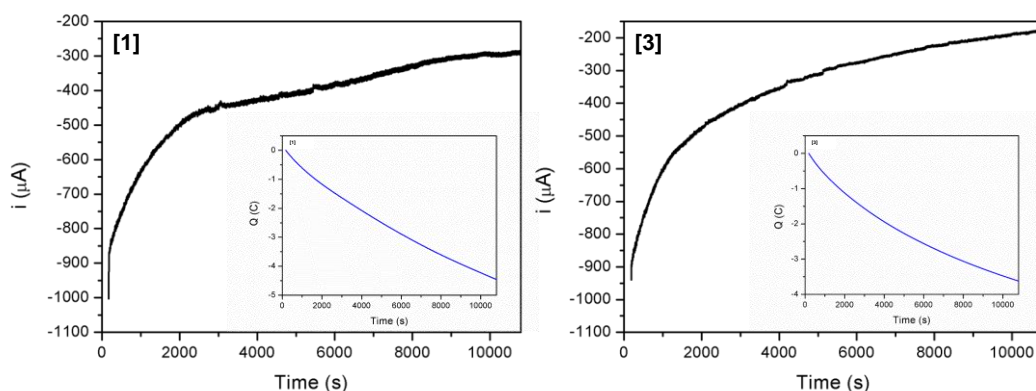

**Figure S7.** CPE results. Behaviour of current during electrolysis of **1** (left) and **3** (right). Inset: Charge passed during electrolysis. Glassy carbon was used as working electrode, platinum wire as counter and SCE as reference electrode.

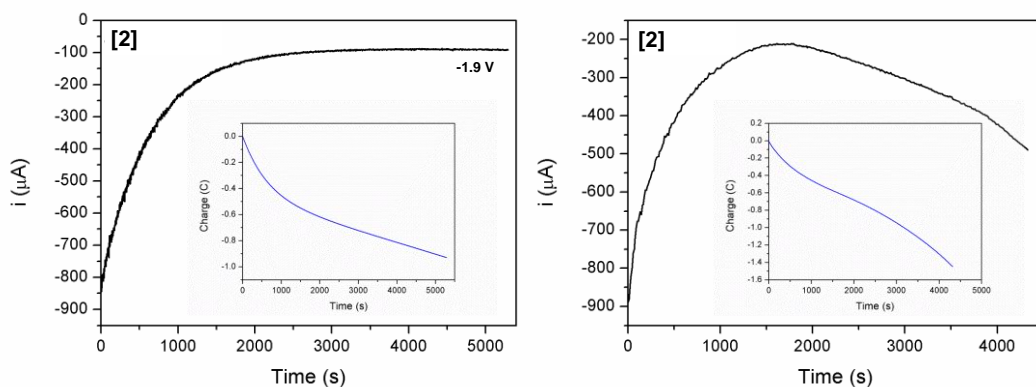

**Figure S8.** CPE results. Behaviour of current during electrolysis of **2** at -1.9 (left) and 2.1 V (right). Inset: Charge passed during electrolysis. Glassy carbon was used as working electrode, platinum wire as counter and SCE as reference electrode.

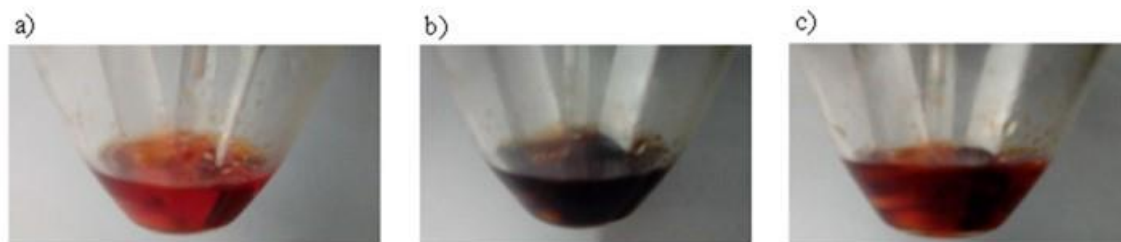

**Figure S9.** Colour change observation from orange (a) (before electrolysis) to brown (b) (after electrolysis). After air injection into the solution colour reverts back to orange (c).

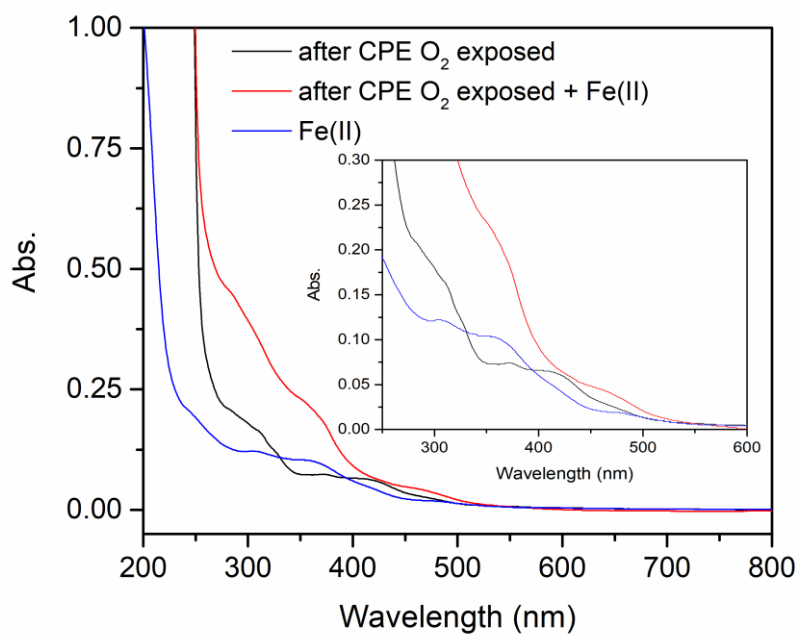

**Figure S10.** UV-vis spectra in H<sub>2</sub>O of: solution of **2** after CPE and injection of O<sub>2</sub> (blue line); same solution after addition of Fe(II) solution (red line); Fe(II) solution.

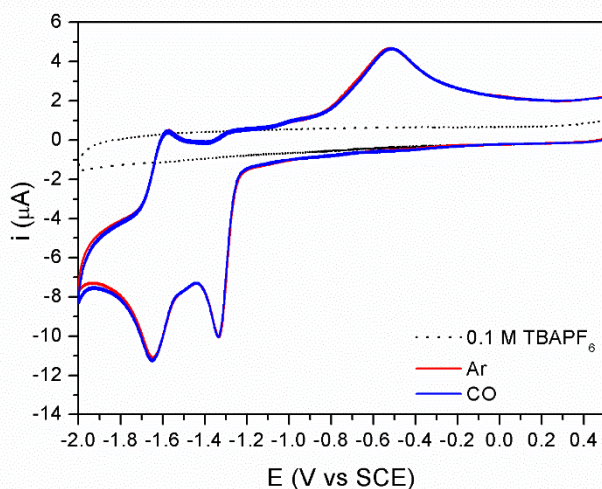

**Figure S11.** Cyclic voltammograms of complex **3** (1 mM) in DMF, argon and carbon monoxide saturated solutions using TBAPF<sub>6</sub> as supporting electrolyte (0.1 M) at 100 mV s<sup>-1</sup>. Glassy carbon was used as working, platinum wire as counter and SCE as reference electrodes.

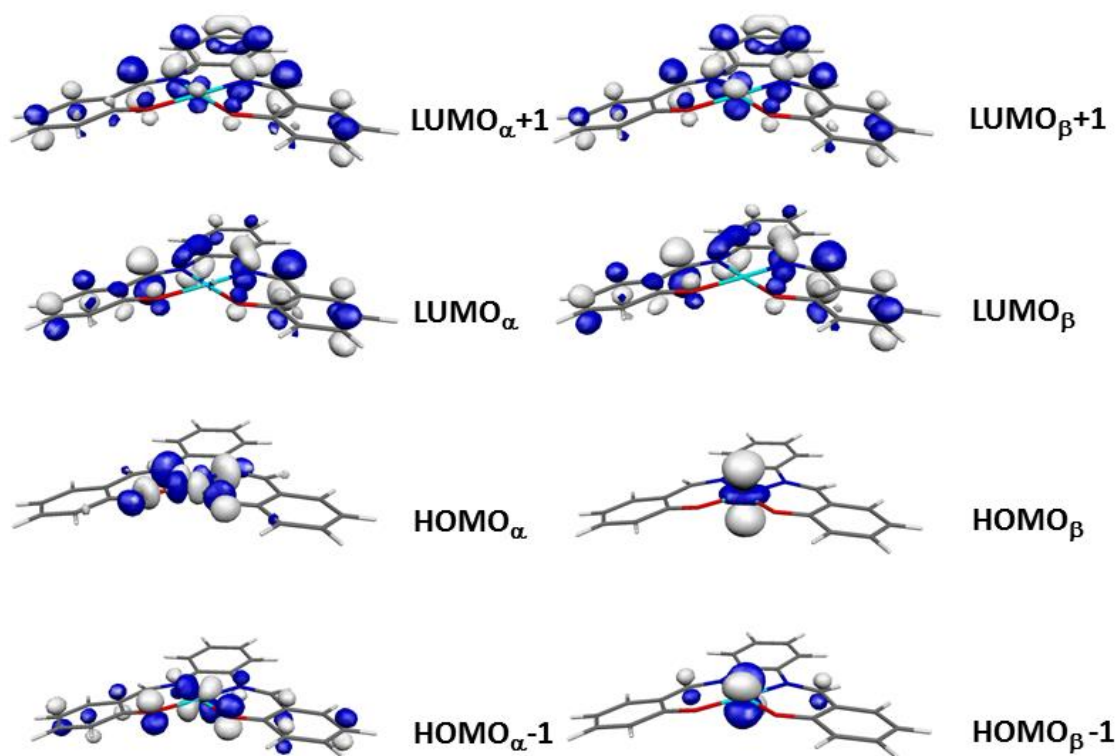

**Figure S12.** Frontier orbitals of <sup>2</sup>[1].



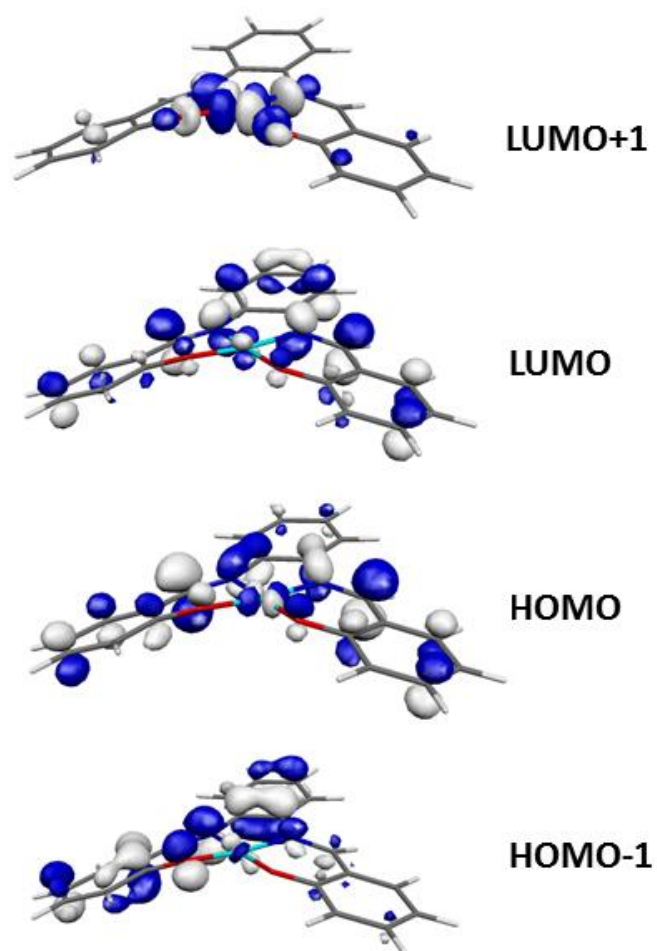

**Figure S13.** Frontier orbitals of  $1[1]2^-$ .

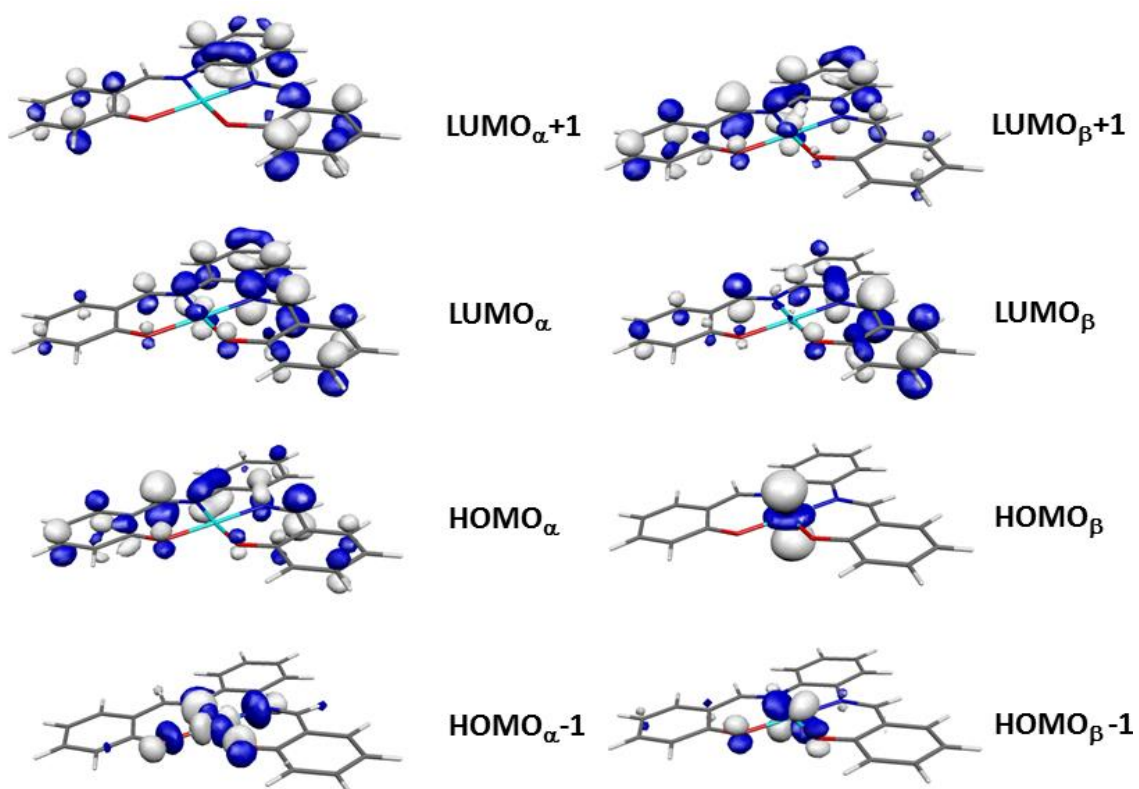

**Figure S14.** Frontier orbitals of  $^3[1]^{2-}$ .

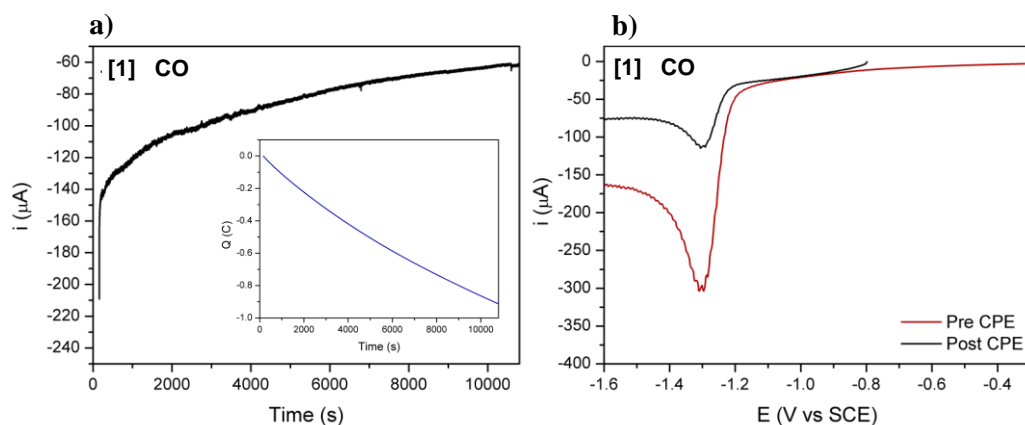

**Figure S15.** a) Current and charge (inset) behavior during CPE of complex **1** under CO at -1.6 V vs SCE. b) Linear voltammograms before and after electrolysis of **1** in DMF using TBAPF<sub>6</sub> as supporting electrolyte (0.1 M) at 10 mV s<sup>-1</sup>. Glassy carbon was used as working electrode, platinum wire as counter and SCE as reference electrode.

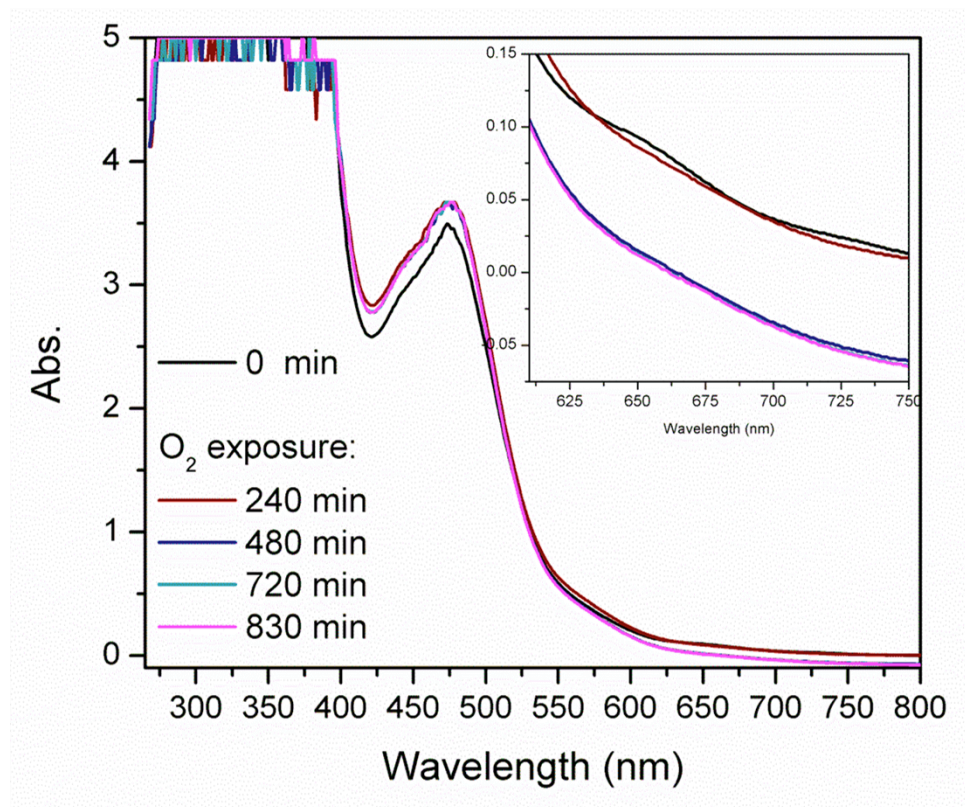

**Figure S16.** UV-vis spectra obtained for **1** after CPE under CO before and during exposure of the solution to atmospheric O<sub>2</sub>.

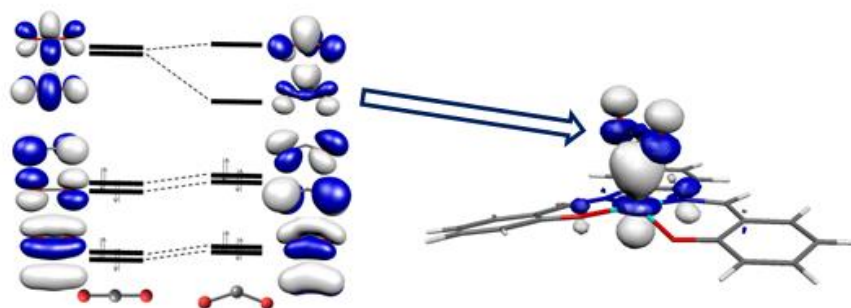

**Figure S17.** Walsh diagram for the conversion of linear into angular CO<sub>2</sub>: the π orbitals (left) and H<sub>β</sub>-1 Ni-C σ bonding orbital depicting the back donation from the metal to the LUMO of CO<sub>2</sub> (right) in <sup>3</sup>[**1**(CO<sub>2</sub>)]<sup>2-</sup>.

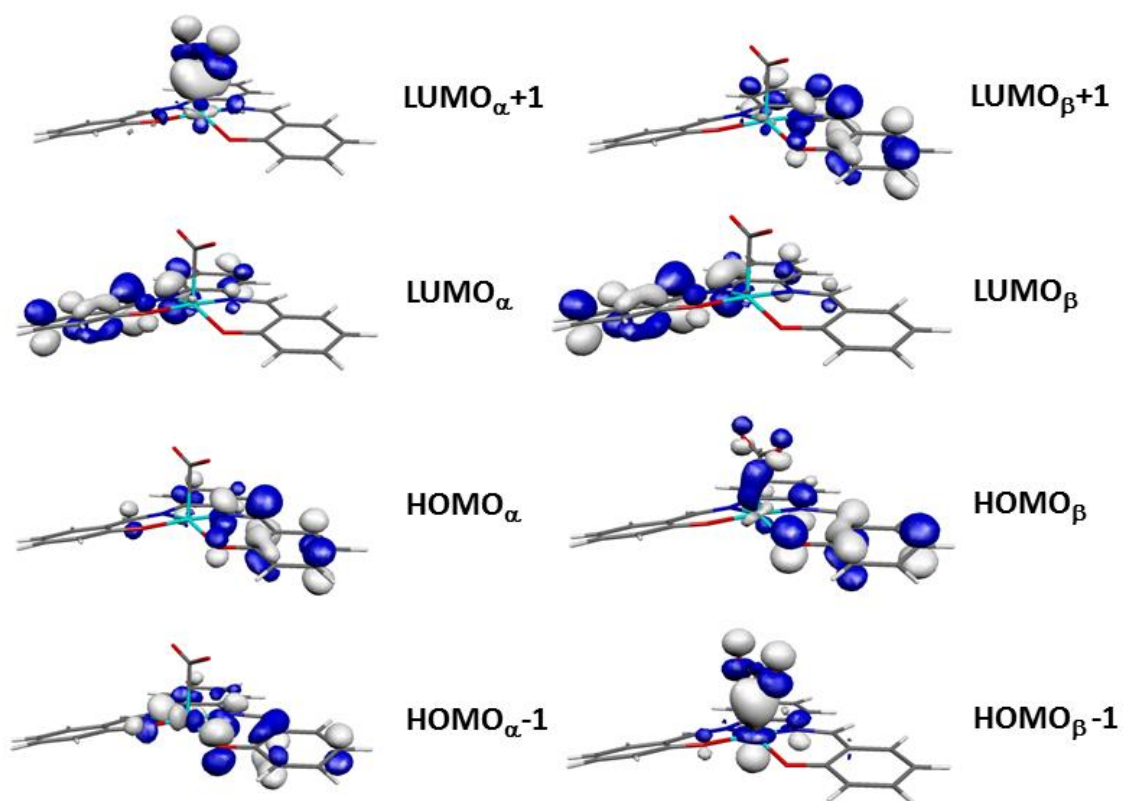

**Figure S18.** Frontier orbitals of  ${}^3[1(\text{CO}_2)]^{2-}$ .

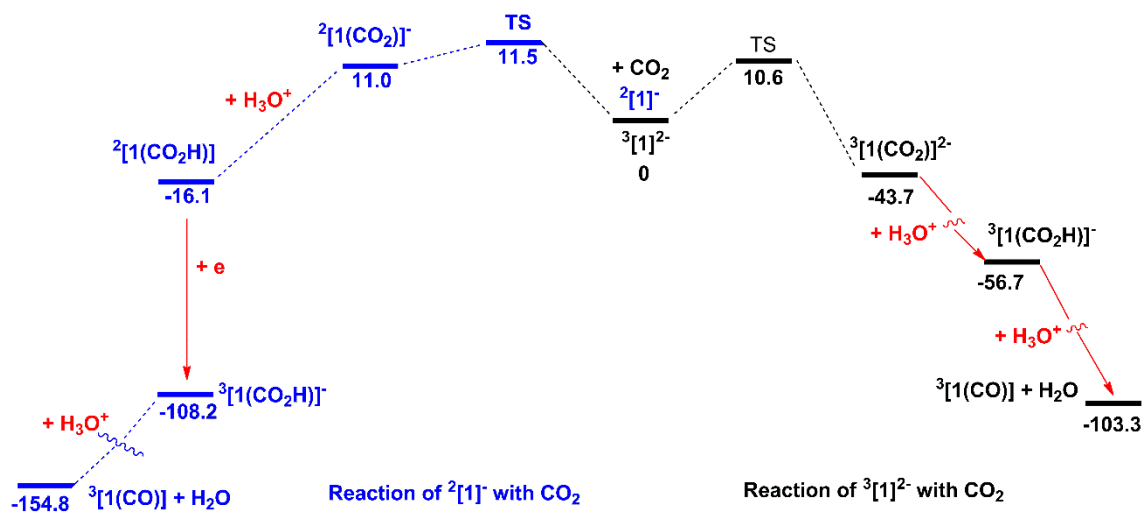

**Figure S19.** Energy profile for the reactions of the reduced complexes  ${}^2[1]^-$  and  ${}^3[1]^{2-}$  with  $\text{CO}_2$  in DMF (relative energies,  $\Delta G$ , in kcal mol $^{-1}$ ).

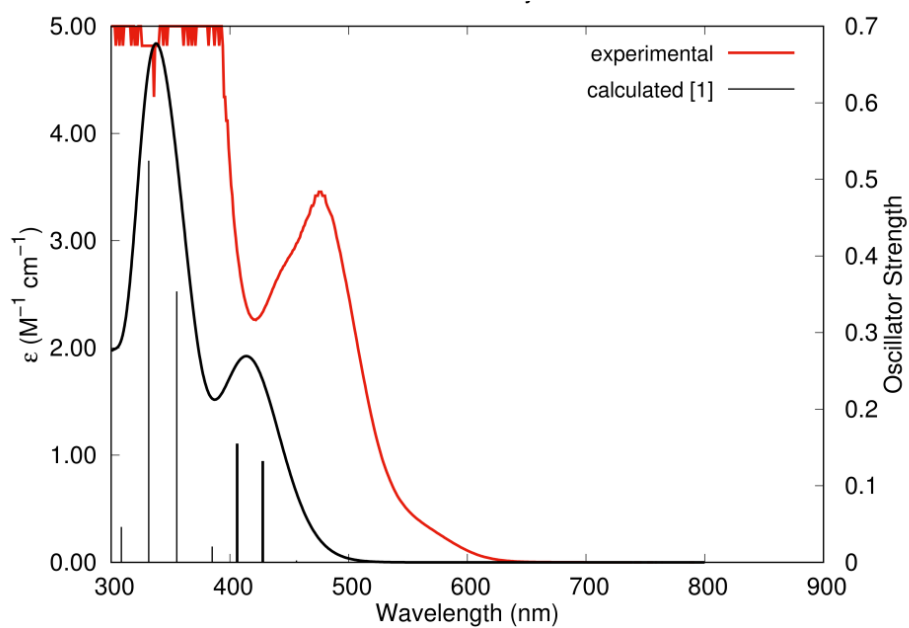

**Figure S20.** Experimental and calculated (TDDFT, black line) spectra of [Ni(salphen)] [1]. The sticks correspond to the calculated wavelengths.

**Table S1.** Relevant TD-DFT excitation energies ( $\lambda$ ), oscillator strengths ( $f$ ) and compositions, for complexes [Ni(salphen)], [1].

| Complex | $\lambda$ (nm) | $f$    | Composition                                          | $\lambda^{\text{exp}}$ (nm) |
|---------|----------------|--------|------------------------------------------------------|-----------------------------|
| [1]     | 428            | 0.1323 | H $\rightarrow$ L (98%)                              | 476                         |
|         | 406            | 0.1551 | H-1 $\rightarrow$ L (70%), H $\rightarrow$ L+1 (26%) |                             |

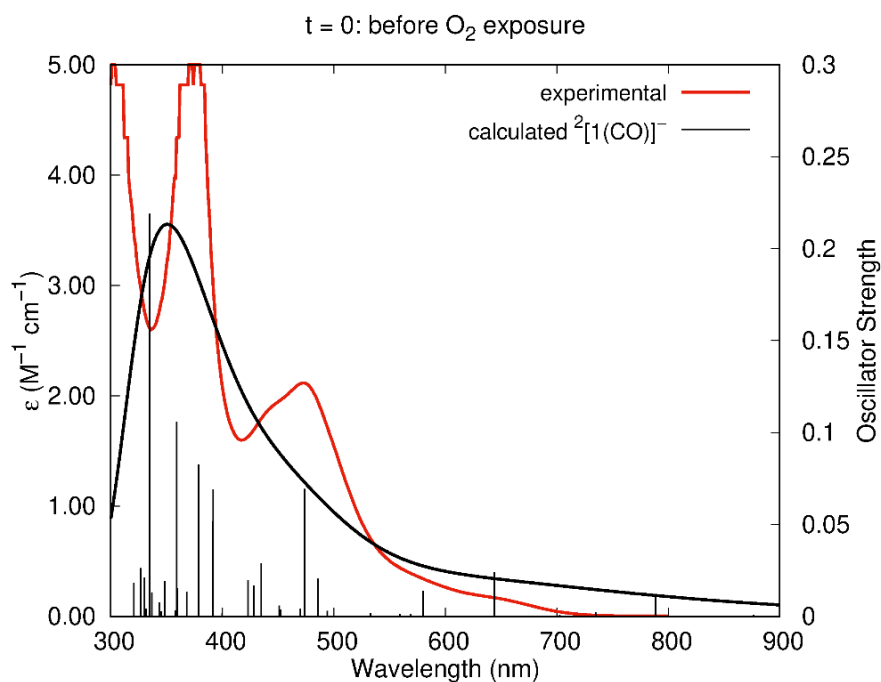

**Figure S21.** Absorption spectrum of the CO container species  ${}^2[1(\text{CO})]^-$ : experimental (red line) and calculated (TDDFT, black line) spectra. The sticks correspond to the calculated wavelengths.

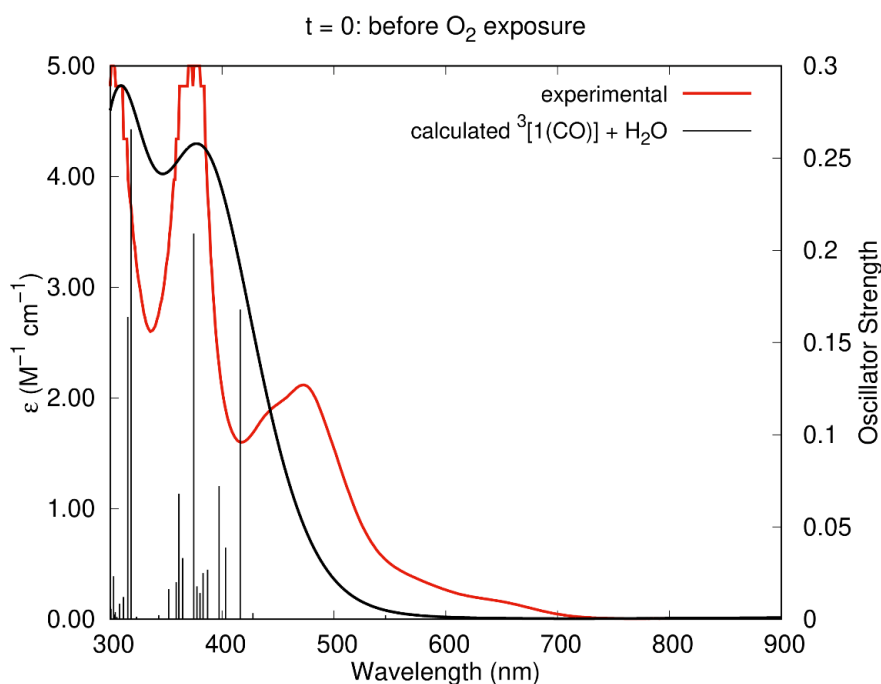

**Figure S22.** Absorption spectrum of the CO container species  ${}^3[1(\text{CO})] + \text{H}_2\text{O}$ : experimental (red line) and calculated (TDDFT, black line) spectra. The sticks correspond to the calculated wavelengths.

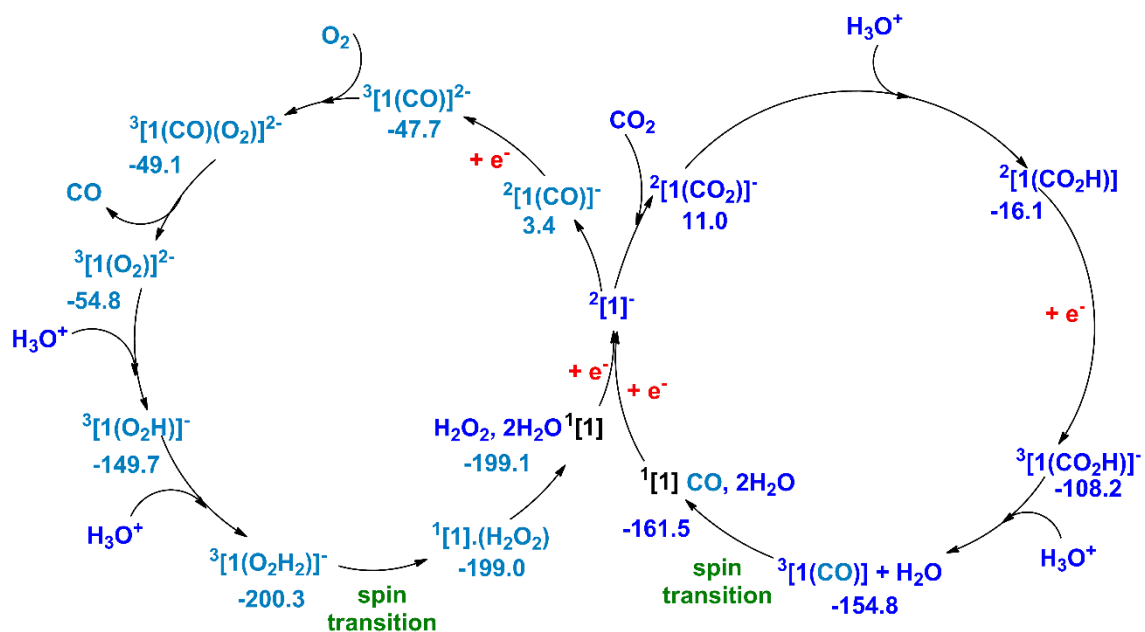

**Figure S23.** Energy profile for the reactions of the reduced complexes  $^2[1]^-$  with  $\text{CO}_2$  (right side, blue) and  $\text{CO}$  (left side, turquoise). The free energies,  $\Delta G$ , are given in  $\text{kcal mol}^{-1}$  and the reference 0 is the energy of  $^2[1]^-$ . The two reduction and the spin transition steps are highlighted in both cycles.
